# Supplementary material for: Production of the Quinone-Methide Triterpene Maytenin byIn VitroAdventitious Roots ofPeritassa campestris(Cambess.) A.C.Sm. (Celastraceae) and Rapid Detection and Identification by APCI-IT-MS/MS
Source: Hindawi journal article supplement (doi:10.1155/2013/485837), 2013-01-01
Supplement: f1 [file 485837.f1.pdf]

# Generic Display Report

Faculdade de Ciencias Farmaceuticas de Ribeirao Preto-USP

## Analysis Info

Analysis Name D:\Data\SILVIA T\TINGENONE\_POS.d  
Method Tune\_Low\_Tomaz\_Pos\_1300u\_NOVO.m  
Sample Name TINGENONE\_POS  
Comment

Acquisition Date 8/26/2013 4:50:56 PM

Operator BDAL@DE  
Instrument micrOTOF-Q II

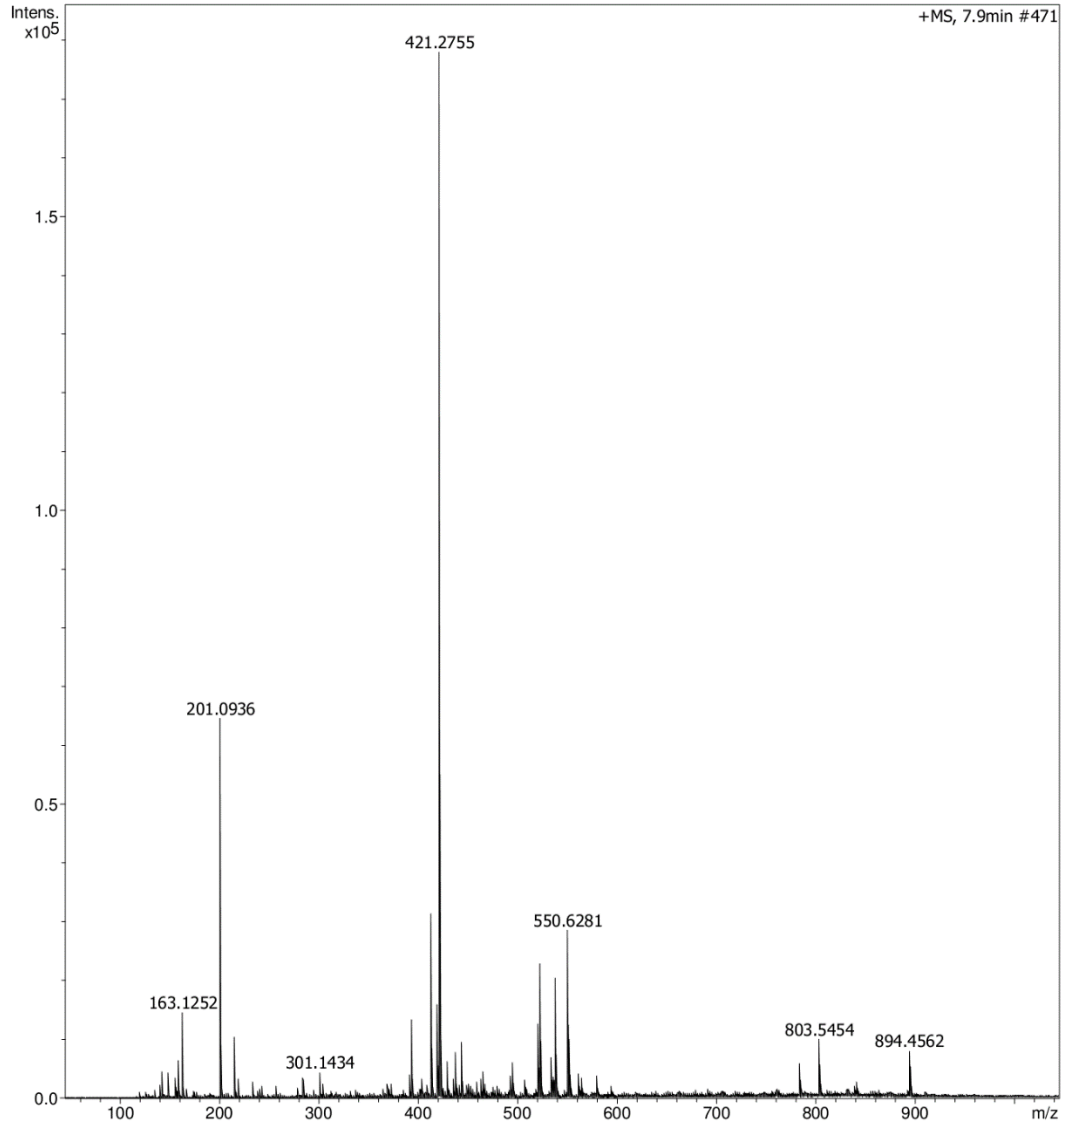

PROTON CDCl3 {C:\Bruker\TOPSPIN} dcro 29

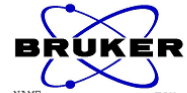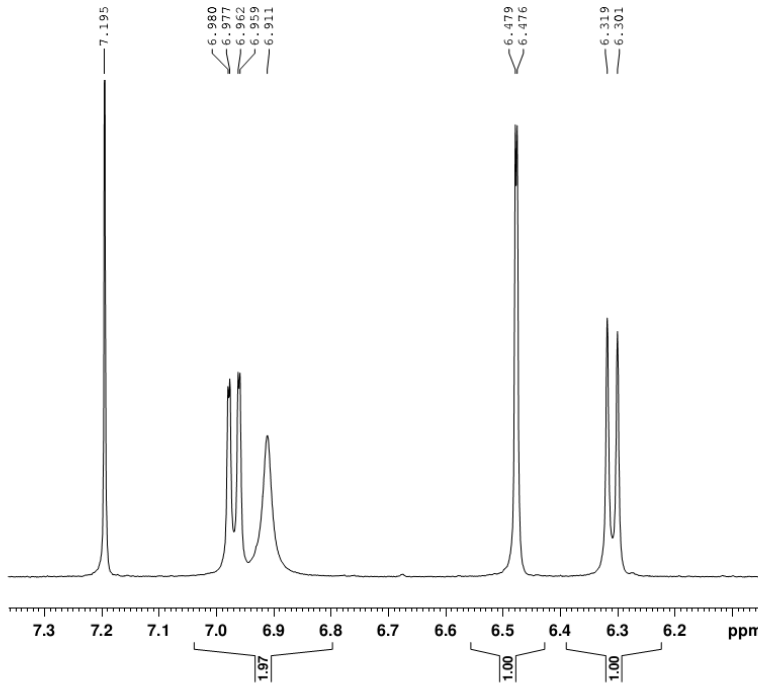

```

NAME      may
EXPNO     1
PROCNO    1
Date_     20121013
Time      22.20
INSTRUM   spect
PROBHD    5 mm Dual 13C/
PULPROG   zg30
TD         65536
SOLVENT   CDCl3
NS         16
DS         2
SWH       8278.146 Hz
FIDRES    0.126314 Hz
AQ        3.9584243 sec
RG         181
DW        60.400 usec
DE        6.50 usec
TE        294.8 K
D1        1.00000000 sec
TDO       1

```

```

===== CHANNEL f1 =====
NUC1      1H
P1        12.00 usec
PL1       1.10 dB
SFO1     400.1324710 MHz
SI        32768
SF        400.1300354 MHz
WDW       EM
SSB       0
LB        0.30 Hz
GB         0
PC         1.00

```

PROTON CDCl3 {C:\Bruker\TOPSPIN} dcro 29

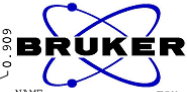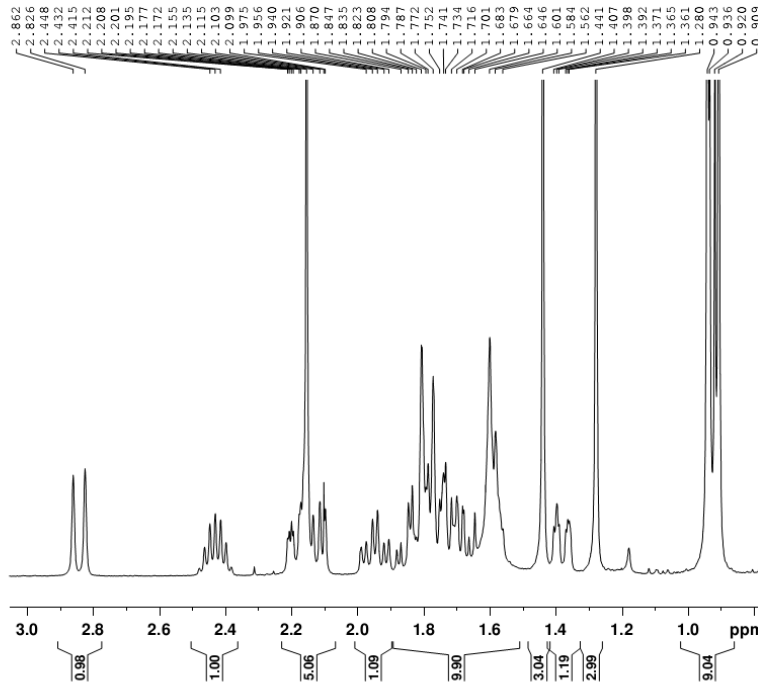

```

NAME      may
EXPNO     1
PROCNO    1
Date_     20121013
Time      22.20
INSTRUM   spect
PROBHD    5 mm Dual 13C/
PULPROG   zg30
TD         65536
SOLVENT   CDCl3
NS         16
DS         2
SWH       8278.146 Hz
FIDRES    0.126314 Hz
AQ        3.9584243 sec
RG         181
DW        60.400 usec
DE        6.50 usec
TE        294.8 K
D1        1.00000000 sec
TDO       1

```

```

===== CHANNEL f1 =====
NUC1      1H
P1        12.00 usec
PL1       1.10 dB
SFO1     400.1324710 MHz
SI        32768
SF        400.1300354 MHz
WDW       EM
SSB       0
LB        0.30 Hz
GB         0
PC         1.00

```

PROTON CDCl3 {C:\Bruker\TOPSPIN} dcro 29

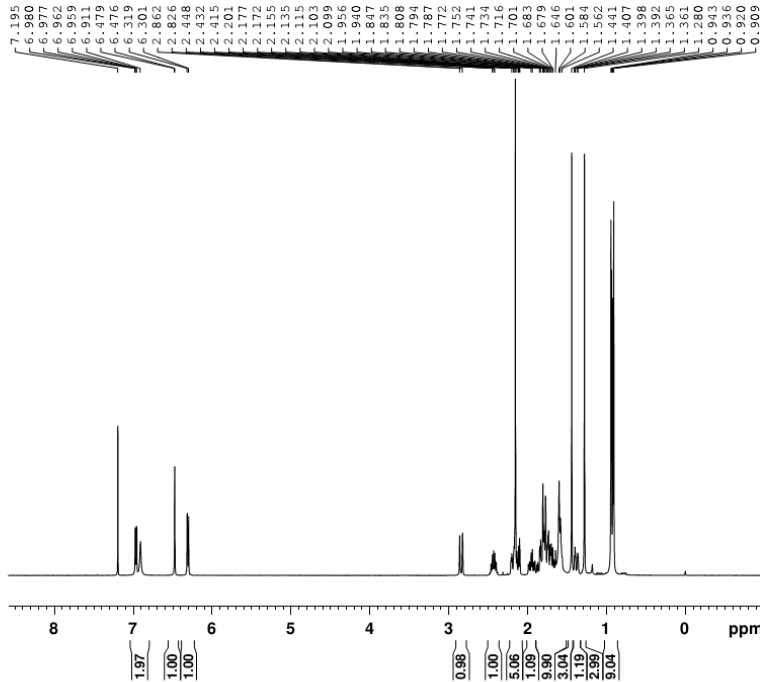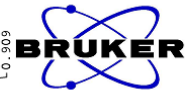

NAME may  
EXPNO 1  
PROCNO 1  
Date\_ 20121013  
Time 22.20  
INSTRUM spect  
PROBHD 5 mm Dual 13C/  
PULPROG zg30  
TD 65536  
SOLVENT CDCl3  
NS 16  
DS 2  
SWH 8278.146 Hz  
FIDRES 0.126314 Hz  
AQ 3.9584243 sec  
RG 181  
DW 60.400 usec  
DE 6.50 usec  
TE 294.8 K  
D1 1.00000000 sec  
TDO 1

===== CHANNEL f1 =====  
NUC1 1H  
P1 12.00 usec  
PL1 1.10 dB  
SFO1 400.1324710 MHz  
SI 32768  
SF 400.1300354 MHz  
WDW EM  
SSB 0  
LB 0.30 Hz  
GB 0  
PC 1.00

C13CPD CDCl3 {C:\Bruker\TOPSPIN} dcro 29

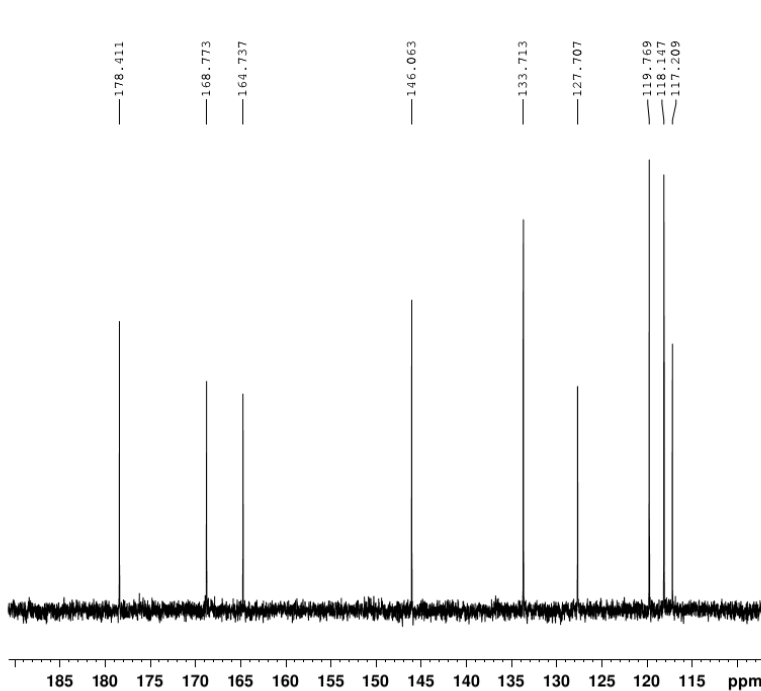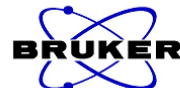

NAME may  
EXPNO 15  
PROCNO 1  
Date\_ 20121014  
Time 6.09  
INSTRUM spect  
PROBHD 5 mm Dual 13C/  
PULPROG zgpg30  
TD 65536  
SOLVENT CDCl3  
NS 8192  
DS 4  
SWH 23980.814 Hz  
FIDRES 0.365918 Hz  
AQ 1.3664756 sec  
RG 3649.1  
DW 20.850 usec  
DE 6.50 usec  
TE 295.6 K  
D1 2.00000000 sec  
D11 0.03000000 sec  
TDO 1

===== CHANNEL f1 =====  
NUC1 13C  
P1 8.00 usec  
PL1 2.50 dB  
SFO1 100.6228298 MHz

===== CHANNEL f2 =====  
CPDPRG2 waltz16  
NUC2 1H  
PCPD2 100.00 usec  
PL2 1.10 dB  
PL12 20.19 dB  
PL13 22.50 dB  
SFO2 400.1316005 MHz  
SI 32768  
SF 100.6127690 MHz  
WDW EM  
SSB 0  
LB 1.00 Hz  
GB 0  
PC 1.40

C13CPD CDCl3 {C:\Bruker\TOPSPIN} dcro 29

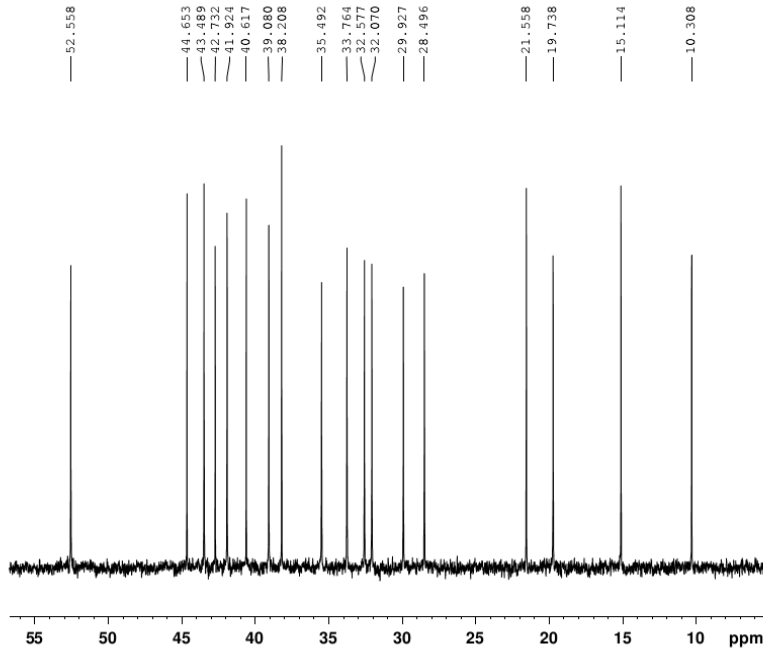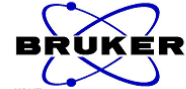

```
NAME          may
EXPNO         15
PROCNO        1
Date_         20121014
Time          6.09
INSTRUM       spect
PROBHD        5 mm Dual 13C/
PULPROG       zgpg30
TD            65536
SOLVENT       CDCl3
NS            8192
DS            4
SWH           23980.814 Hz
FIDRES        0.365918 Hz
AQ            1.3664756 sec
RG            3649.1
DW            20.850 usec
DE            6.50 usec
TE            295.6 K
D1            2.0000000 sec
D11           0.0300000 sec
TD0           1

===== CHANNEL f1 =====
NUC1           13C
P1             8.00 usec
PL1            2.50 dB
SFO1          100.6228298 MHz

===== CHANNEL f2 =====
CPDPRG2       waltz16
NUC2           1H
PCPD2         100.00 usec
PL2            1.10 dB
PL12           20.19 dB
PL13           22.50 dB
SFO2          400.1316005 MHz
SI            32768
SF            100.6127690 MHz
WDW            EM
SSB            0
LB             1.00 Hz
GB             0
PC             1.40
```

C13CPD CDCl3 {C:\Bruker\TOPSPIN} dcro 29

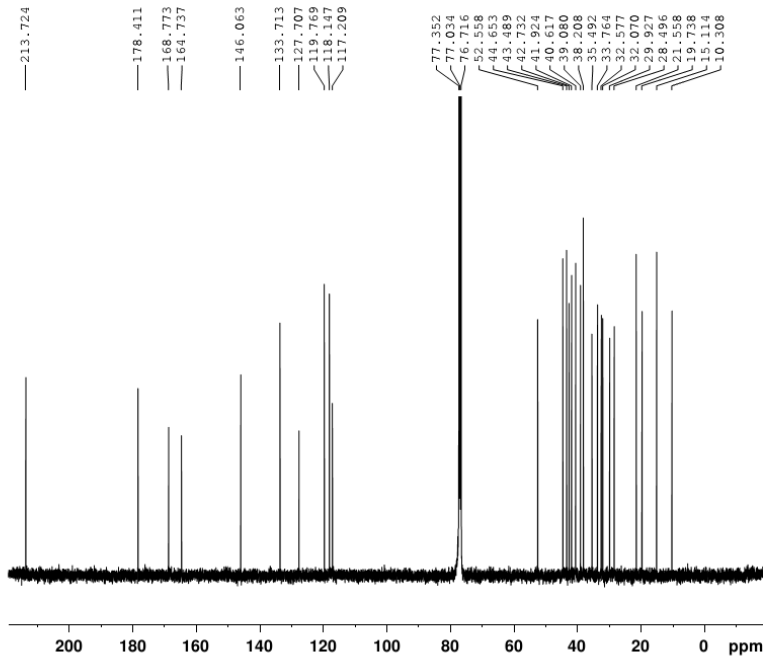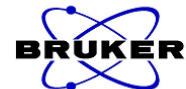

```
NAME          may
EXPNO         15
PROCNO        1
Date_         20121014
Time          6.09
INSTRUM       spect
PROBHD        5 mm Dual 13C/
PULPROG       zgpg30
TD            65536
SOLVENT       CDCl3
NS            8192
DS            4
SWH           23980.814 Hz
FIDRES        0.365918 Hz
AQ            1.3664756 sec
RG            3649.1
DW            20.850 usec
DE            6.50 usec
TE            295.6 K
D1            2.0000000 sec
D11           0.0300000 sec
TD0           1

===== CHANNEL f1 =====
NUC1           13C
P1             8.00 usec
PL1            2.50 dB
SFO1          100.6228298 MHz

===== CHANNEL f2 =====
CPDPRG2       waltz16
NUC2           1H
PCPD2         100.00 usec
PL2            1.10 dB
PL12           20.19 dB
PL13           22.50 dB
SFO2          400.1316005 MHz
SI            32768
SF            100.6127690 MHz
WDW            EM
SSB            0
LB             1.00 Hz
GB             0
PC             1.40
```

COSYGPSW CDC13 {C:\Bruker\TOPSPIN} dcro 29

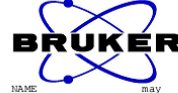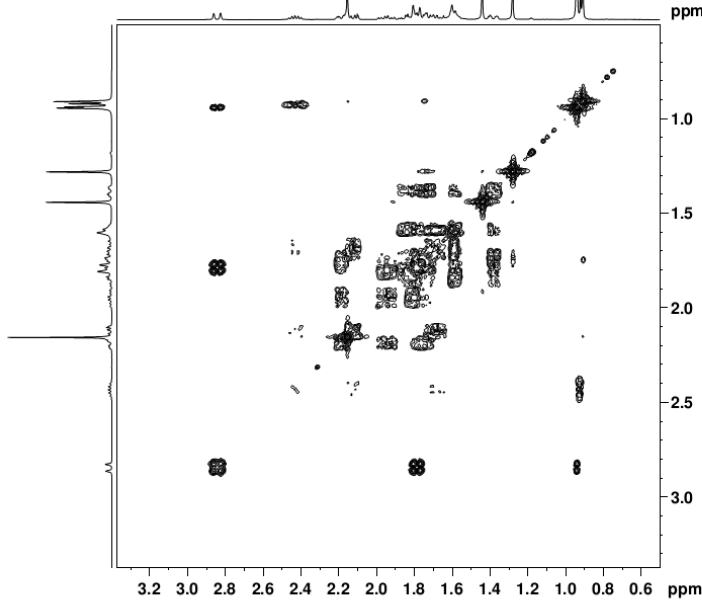

NAME may  
EXPNO 300  
PROCNO 1  
Date\_ 20121014  
Time 9.06  
INSTRUM spect  
PROBHD 5 mm Dual 13C/  
PULPROG cosyppgq  
TD 4096  
SOLVENT CDC13  
NS 8  
DS 8  
SWH 2997.602 Hz  
FIDRES 0.731836 Hz  
AQ 0.6832628 sec  
RG 90.5  
DW 166.800 usec  
DE 6.50 usec  
TE 295.0 K  
DO 0.0000300 sec  
D1 1.18624604 sec  
D13 0.0000400 sec  
D16 0.0002000 sec  
IN0 0.00033360 sec

----- CHANNEL f1 -----  
NUC1 1H  
PD 12.00 usec  
P1 12.00 usec  
PL1 1.10 dB  
SFO1 400.1315246 MHz

----- GRADIENT CHANNEL -----  
GPNAM1 sine:100  
GPZ1 10.00 %  
P16 1000.00 usec  
ND0 1  
TD 320  
SFO1 400.1315 MHz  
FIDRES 9.367506 Hz  
SW 7.492 ppm  
FwMODE QF  
SI 1024  
SF 400.1300354 MHz  
WDW SINE  
SSB 0  
LB 0.00 Hz  
GB 0  
PC 1.40  
SI 1024  
MC2 QF  
SF 400.1300354 MHz  
WDW SINE  
SSB 0  
LB 0.00 Hz  
GB 0

COSYGPSW CDC13 {C:\Bruker\TOPSPIN} dcro 29

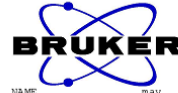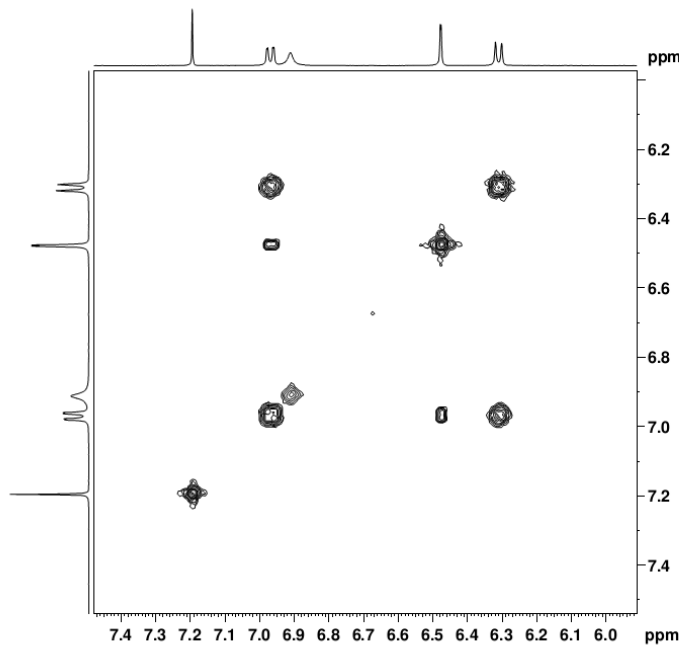

NAME may  
EXPNO 300  
PROCNO 1  
Date\_ 20121014  
Time 9.06  
INSTRUM spect  
PROBHD 5 mm Dual 13C/  
PULPROG cosyppgq  
TD 4096  
SOLVENT CDC13  
NS 8  
DS 8  
SWH 2997.602 Hz  
FIDRES 0.731836 Hz  
AQ 0.6832628 sec  
RG 90.5  
DW 166.800 usec  
DE 6.50 usec  
TE 295.0 K  
DO 0.0000300 sec  
D1 1.18624604 sec  
D13 0.0000400 sec  
D16 0.0002000 sec  
IN0 0.00033360 sec

----- CHANNEL f1 -----  
NUC1 1H  
PD 12.00 usec  
P1 12.00 usec  
PL1 1.10 dB  
SFO1 400.1315246 MHz

----- GRADIENT CHANNEL -----  
GPNAM1 sine:100  
GPZ1 10.00 %  
P16 1000.00 usec  
ND0 1  
TD 320  
SFO1 400.1315 MHz  
FIDRES 9.367506 Hz  
SW 7.492 ppm  
FwMODE QF  
SI 1024  
SF 400.1300354 MHz  
WDW SINE  
SSB 0  
LB 0.00 Hz  
GB 0  
PC 1.40  
SI 1024  
MC2 QF  
SF 400.1300354 MHz  
WDW SINE  
SSB 0  
LB 0.00 Hz  
GB 0

COSYGPSW CDC13 {C:\Bruker\TOPSPIN} dcro 29

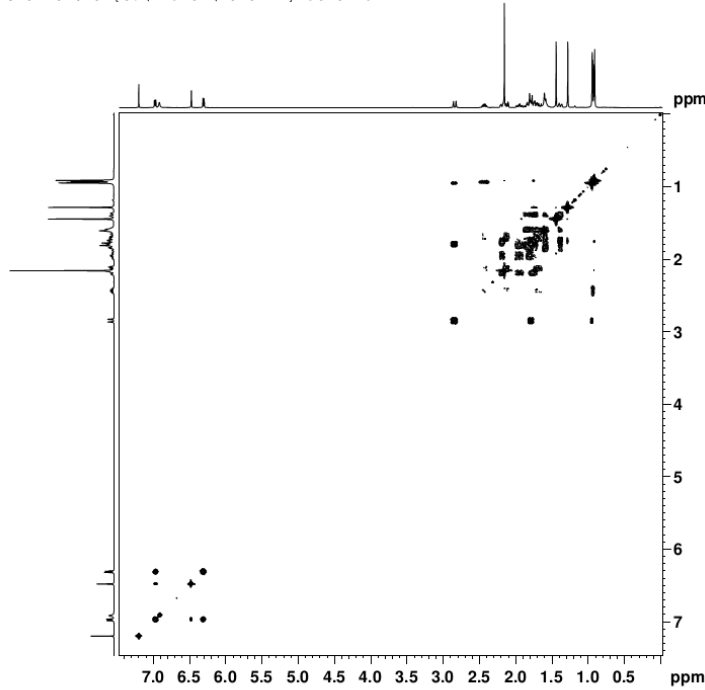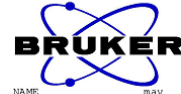

```
NAME may
EXPNO 300
PROCNO 1
Date_ 20121014
Time 9.06
INSTRUM spect
PROBHD 5 mm Dual 13C/
PULPROG cosygpsw
TD 4096
SOLVENT CDC13
NS 8
DS 8
SWH 2997.602 Hz
FIDRES 0.731836 Hz
AQ 0.6832628 sec
RG 90.5
DW 166.800 usec
DE 6.50 usec
TE 295.0 K
D0 0.0000300 sec
D1 1.18624604 sec
D13 0.0000400 sec
D16 0.0002000 sec
IN0 0.0003360 sec

----- CHANNEL f1 -----
NUC1 1H
P0 12.00 usec
P1 12.00 usec
PL1 1.10 dB
SFO1 400.1315246 MHz

----- GRADIENT CHANNEL -----
GPM1 SINE 100
GPZ1 10.00 %
P16 1000.00 usec
ND0 1
TD 320
SFO1 400.1315 MHz
FIDRES 9.367506 Hz
SW 7.492 ppm
FnMODE CF
SI 1024
SF 400.1300354 MHz
WDW SINE
SSB 0
LB 0.00 Hz
GB 0
PC 1.40
SI 1024
MC2 CF
SF 400.1300354 MHz
WDW SINE
SSB 0
LB 0.00 Hz
GB 0
```

C13DEPT135 CDC13 {C:\Bruker\TOPSPIN} dcro 29

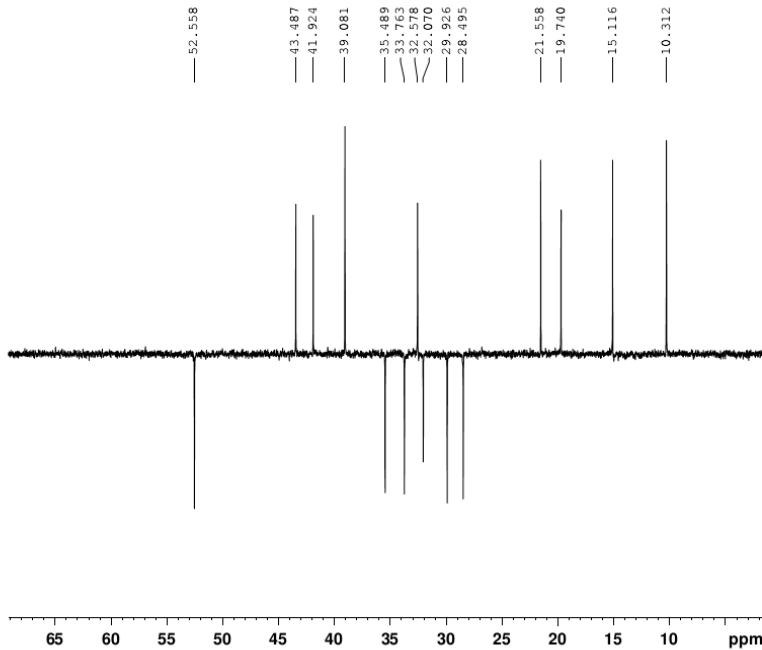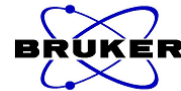

```
NAME may
EXPNO 16
PROCNO 1
Date_ 20121014
Time 9.05
INSTRUM spect
PROBHD 5 mm Dual 13C/
PULPROG dept135
TD 65536
SOLVENT CDC13
NS 3072
DS 4
SWH 23980.814 Hz
FIDRES 0.365918 Hz
AQ 1.3664756 sec
RG 3251
DW 20.850 usec
DE 6.50 usec
TE 295.1 K
CNST2 145.0000000
D1 2.00000000 sec
D2 0.0034828 sec
D12 0.0002000 sec
TDO 1

===== CHANNEL f1 =====
NUC1 13C
P1 8.00 usec
P2 16.00 usec
PL1 2.50 dB
SFO1 100.6228298 MHz

===== CHANNEL f2 =====
CPDPRG2 waltz16
NUC2 1H
P3 11.10 usec
P4 22.20 usec
PCPD2 100.00 usec
PL2 1.10 dB
PL12 20.19 dB
SFO2 400.1316005 MHz
SI 32768
SF 100.6127690 MHz
WDW EM
SSB 0
LB 1.00 Hz
GB 0
PC 1.40
```

C13DEPT135 CDC13 {C:\Bruker\TOPSPIN} dcro 29

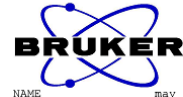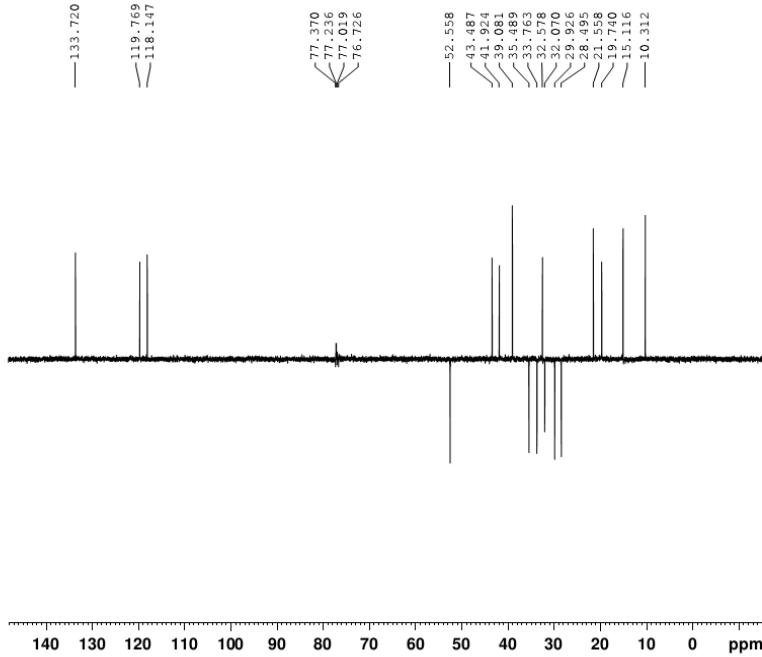

```

NAME          may
EXPNO         16
PROCNO        1
Date_         20121014
Time          9.05
INSTRUM       spect
PROBHD        5 mm Dual 13C/
PULPROG       dept135
TD            65536
SOLVENT       CDC13
NS            3072
DS            4
SWH           23980.814 Hz
FIDRES        0.365918 Hz
AQ            1.3664756 sec
RG            3251
DW            20.850 usec
DE            6.50 usec
TE            295.1 K
CNST2         145.0000000
D1            2.000000000 sec
D2            0.00344828 sec
D12           0.00002000 sec
TDO           1

===== CHANNEL f1 =====
NUC1          13C
P1            8.00 usec
P2            16.00 usec
PL1           2.50 dB
SFO1         100.6228298 MHz

===== CHANNEL f2 =====
CPDPRG2       waltz16
NUC2          1H
P3            11.10 usec
P4            22.20 usec
PCPD2         100.00 usec
PL2           1.10 dB
PL12          20.19 dB
SFO2         400.1316005 MHz
SI            32768
SF           100.6127690 MHz
WDW           EM
SSB           0
LB            1.00 Hz
GB            0
PC            1.40

```

HMBCGP CDC13 {C:\Bruker\TOPSPIN} dcro 29

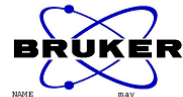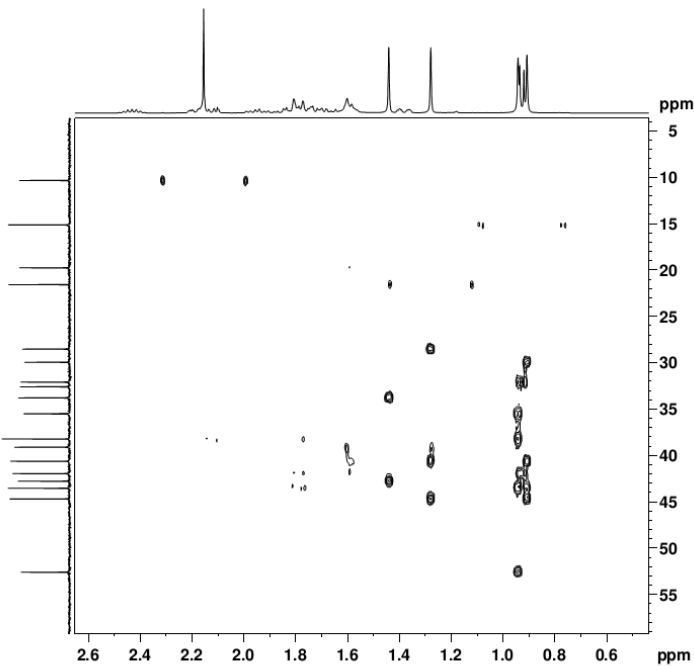

```

NAME          may
EXPNO         500
PROCNO        1
Date_         20121014
Time          13.14
INSTRUM       spect
PROBHD        5 mm Dual 13C/
PULPROG       hmccp135dot
TD            4096
SOLVENT       CDC13
NS            24
DS            16
SWH           2997.602 Hz
FIDRES        0.731836 Hz
AQ            0.6832528 sec
RG            16384
DW            166.800 usec
DE            6.50 usec
TE            295.3 K
CNST2         145.0000000
CNST13        8.0000000
CP           0.000000000 sec
D1            1.20918405 sec
D2            0.00344828 sec
D6            0.06250000 sec
D16           0.00000000 sec
IND           0.00002235 sec

===== CHANNEL f1 =====
NUC1          13C
P1            12.00 usec
P2            24.00 usec
PL1           1.10 dB
SFO1         400.1315246 MHz

===== CHANNEL f2 =====
NUC2          1H
P3            8.00 usec
P4            2.50 dB
SFO2         100.6228138 MHz

===== GRADIENT CHANNEL =====
GPMAG1        SINE:100
GPMAG2        SINE:100
GPMAG3        SINE:100
GF1           40.00 %
GF2           30.00 %
GF3           40.00 %
P16           1000.00 usec
IND           320
SFO1          100.6228 MHz
FIDRES        69.83697 Hz
SW            222.095 ppm
FPMODC        GF
SF            2046
SFO2          400.130554 MHz
WDW           SINE
SSB           0
LB            0.00 Hz
GB            0
PC            1.40
SF            1024
MC2           GF
SFO1          100.6127690 MHz
WDW           SINE
SSB           0
LB            0.00 Hz
GB            0

```

HMBCGP CDCl3 (C:\Bruker\TOPSPIN) dcro 29

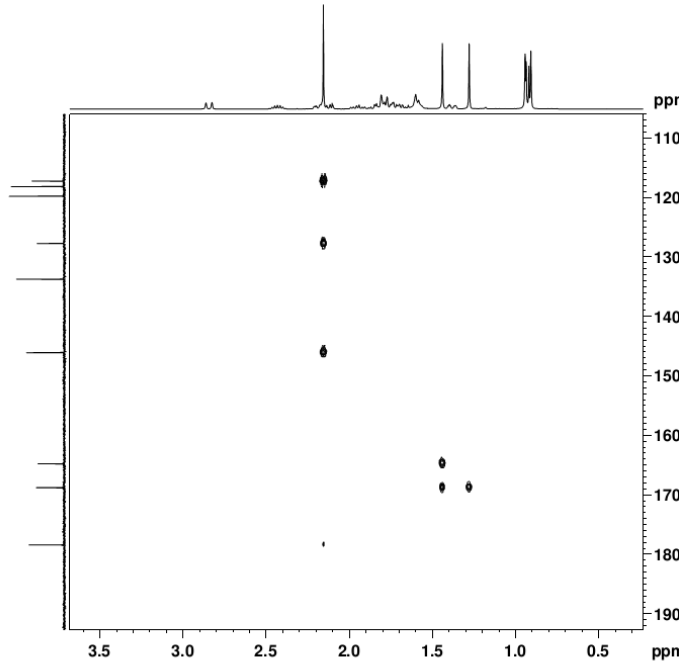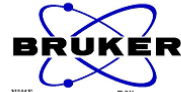

```

NAME          may
EXPNO         500
PROCNO        1
Date_         20121014
Time          13.14
INSTRUM       spect
PROBHD        5 mm Dual 13C/
PULPROG       hmcgpg1p3qf
TD            4096
SOLVENT       CDCl3
NS            24
DS            16
SWH           2997.602 Hz
FIDRES        0.731836 Hz
AQ            0.6832628 sec
RG            16384
DE            166.800 usec
TE            295.3 K
CHST2         145.000000
CHST13        8.000000
D0            0.00000300 sec
D1            1.20918405 sec
D2            0.00344828 sec
D6            0.00250000 sec
D16           0.00020000 sec
IN0           0.00002235 sec

===== CHANNEL f1 =====
NUC1          1H
P1            12.00 usec
P2            24.00 usec
PL1           1.10 dB
SFO1          400.1315446 MHz

===== CHANNEL f2 =====
NUC2          13C
P3            8.00 usec
P4            8.00 usec
PL2           1.10 dB
SFO2          100.6228138 MHz

===== GRADIENT CHANNEL =====
GRNAM1        SINE:1.00
GRNAM2        SINE:1.00
GRNAM3        SINE:1.00
GFZ1          50.00 %
GFZ2          30.00 %
GFZ3          40.10 %
F16           1000.00 usec
WDW           EM
SSB           0
SF01          100.6228138 MHz
FIDRES        69.836967 Hz
SR            222.095 ppm
FMODE         CF
SI            2048
SF            400.1306354 MHz
WDW           SINC
SSB           0
LB            0.00 Hz
GB            0
PC            1.40
SI            1024
MC2           CF
SF            100.617696 MHz
WDW           SINC
SSB           0
LB            0.00 Hz
GB            0
  
```

HMBCGP CDCl3 (C:\Bruker\TOPSPIN) dcro 29

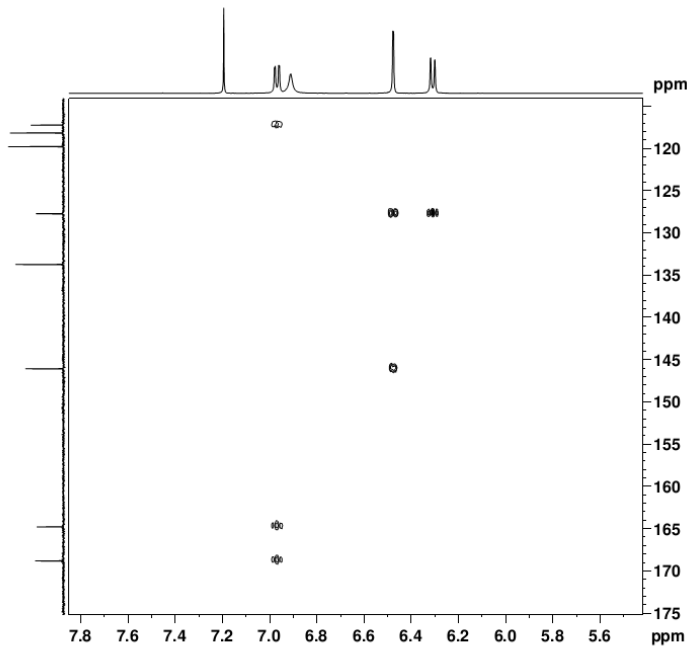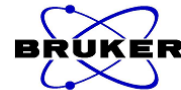

```

NAME          may
EXPNO         500
PROCNO        1
Date_         20121014
Time          13.14
INSTRUM       spect
PROBHD        5 mm Dual 13C/
PULPROG       hmcgpg1p3qf
TD            4096
SOLVENT       CDCl3
NS            24
DS            16
SWH           2997.602 Hz
FIDRES        0.731836 Hz
AQ            0.6832628 sec
RG            16384
DE            166.800 usec
TE            295.3 K
CHST2         145.000000
CHST13        8.000000
D0            0.00000300 sec
D1            1.20918405 sec
D2            0.00344828 sec
D6            0.00250000 sec
D16           0.00020000 sec
IN0           0.00002235 sec

===== CHANNEL f1 =====
NUC1          1H
P1            12.00 usec
P2            24.00 usec
PL1           1.10 dB
SFO1          400.1315446 MHz

===== CHANNEL f2 =====
NUC2          13C
P3            8.00 usec
P4            8.00 usec
PL2           1.10 dB
SFO2          100.6228138 MHz

===== GRADIENT CHANNEL =====
GRNAM1        SINE:1.00
GRNAM2        SINE:1.00
GRNAM3        SINE:1.00
GFZ1          50.00 %
GFZ2          30.00 %
GFZ3          40.10 %
F16           1000.00 usec
WDW           EM
SSB           0
SF01          100.6228138 MHz
FIDRES        69.836967 Hz
SR            222.095 ppm
FMODE         CF
SI            2048
SF            400.1306354 MHz
WDW           SINC
SSB           0
LB            0.00 Hz
GB            0
PC            1.40
SI            1024
MC2           CF
SF            100.617696 MHz
WDW           SINC
SSB           0
LB            0.00 Hz
GB            0
  
```



HMBGCP CDCl3 (C:\Bruker\TOPSPIN) dcro 29

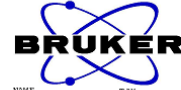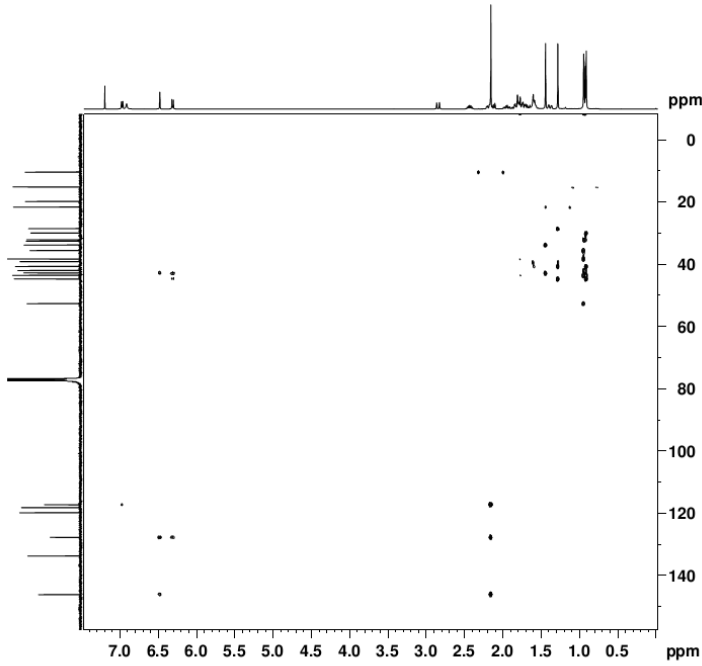

```

NAME          may
EXPNO         500
PROCNO        1
Date_         20121014
Time          15.14
INSTRUM       spect
PROBHD        5 mm Dual 13C/
PULPROG       hmbogp1pndqf
TD            4896
SOLVENT       CDCl3
NS            16
DS            4
SWH           2997.600 Hz
FIDRES        0.731836 Hz
AQ            0.6832628 sec
RG            16384
DW            166.800 usec
DE            6.50 usec
TE            295.3 K
CHST2         145.000000
CHST13        8.0000000
D0            0.0000000 sec
D1            1.2094600 sec
D2            0.00344828 sec
D6            0.00200000 sec
D16           0.00020000 sec
IND           0.0000239 sec

===== CHANNEL f1 =====
NUC1          13C
P1            12.00 usec
P2            24.00 usec
PL1           1.10 dB
SFO1          400.1315246 MHz

===== CHANNEL f2 =====
NUC2          13C
P3            8.00 usec
PL2           2.50 dB
SFO2          100.6228138 MHz

===== GRADIENT CHANNEL =====
GRNAM1        SINE:1.00
GRNAM2        SINE:1.00
GRNAM3        SINE:1.00
GF1           50.00 %
GF2           30.00 %
GF3           40.10 %
P16           1000.00 usec
IND           2
TD            320
SFO1          100.6228 MHz
FIDRES        69.836977 Hz
SW            222.195 ppm
FMODE         CF
SI            2048
SF            400.1300354 MHz
WDW           SINC
SSB           0
LR            0.00 Hz
GB            0
PC            1.40
SI            1024
MC2           CF
SF            100.6127690 MHz
WDW           SINC
SSB           0
LR            0.00 Hz
GB            0
    
```

HSQCETGP CDCl3 (C:\Bruker\TOPSPIN) dcro 29

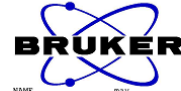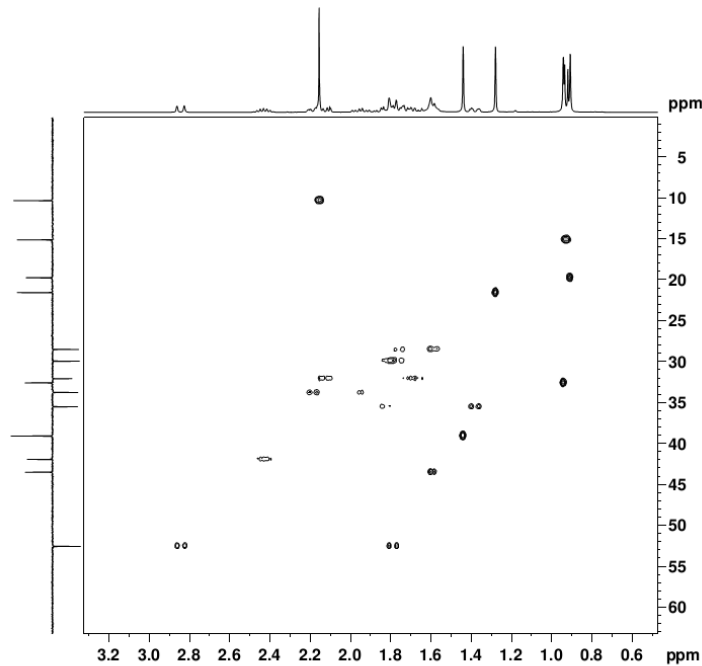

```

NAME          may
EXPNO         400
PROCNO        1
Date_         20121014
Time          10.30
INSTRUM       spect
PROBHD        5 mm Dual 13C/
PULPROG       hsqcetgp
TD            4896
SOLVENT       CDCl3
NS            16
DS            4
SWH           2997.600 Hz
FIDRES        0.731836 Hz
AQ            0.6832628 sec
RG            16384
DW            166.800 usec
DE            6.50 usec
TE            295.3 K
CHST2         145.000000
CHST13        8.0000000
D0            0.0000000 sec
D1            1.3953000 sec
D4            0.00172014 sec
D11           0.00000000 sec
D13           0.00000000 sec
D16           0.00020000 sec
IND           0.00003000 sec
ZGOFTHS

===== CHANNEL f1 =====
NUC1          13C
P1            12.00 usec
P2            24.00 usec
P28           1000.00 usec
PL1           1.10 dB
SFO1          400.1315246 MHz

===== CHANNEL f2 =====
GRNAM1        SINE:1.00
GRNAM2        SINE:1.00
GRNAM3        SINE:1.00
GF1           80.00 %
GF2           20.10 %
GF3           80.00 usec
P16           1000.00 usec
IND           2
TD            320
SFO1          100.62281 MHz
FIDRES        52.689332 Hz
SW            165.638 ppm
FMODE         Echo-Antiecho
SI            2048
SF            400.1300354 MHz
WDW           SINC
SSB           0
LR            0.00 Hz
GB            0
PC            1.40
SI            1024
MC2           Echo-Antiecho
SF            100.6127690 MHz
WDW           SINC
SSB           0
LR            0.00 Hz
GB            0
    
```

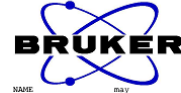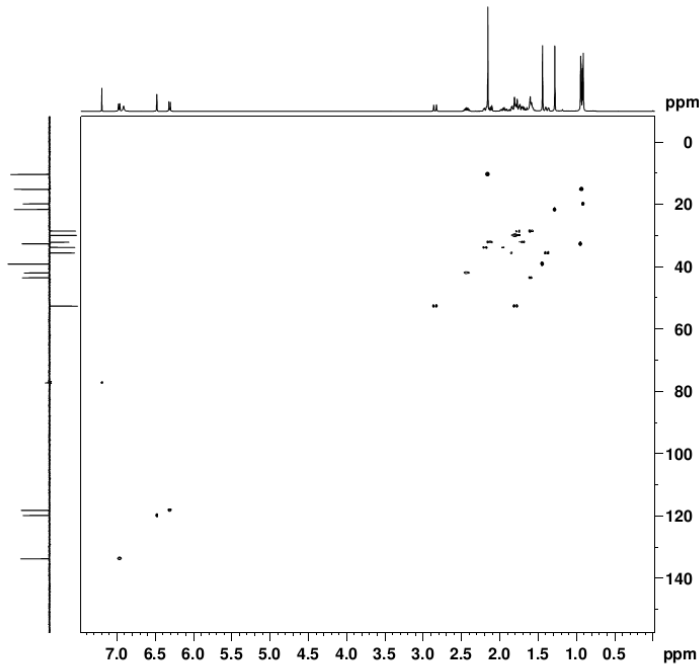

```

NAME          msi
EXPNO         400
PROCNO        1
Date_         20121014
Time          10.30
INSTRUM       spect
PROBHD        5 mm Dual 13C/
PULPROG       zgpg30
TD            4096
SOLVENT       CDCl3
NS            16
DS            16
SWH           2997.402 Hz
FIDRES        0.231916 Hz
AQ            0.6832628 sec
RG            18396.0
DW            166.800 usec
DE            6.50 usec
TE            295.4 K
CST12        145.0000000
D0            0.0000000 sec
D1            1.3993400 sec
D4            0.00172014 sec
D11           0.0300000 sec
D13           0.0000000 sec
D16           0.0002000 sec
IN0           0.0003000 sec
ZGPGFINS

----- CHANNEL f1 -----
NUC1          13C
P1            12.00 usec
P2            24.00 usec
P28           1000.00 usec
PL1           1.10 dB
SFO1          400.1315246 MHz

----- CHANNEL f2 -----
CPDPRG2       zgpg
NUC2          13C
P3            8.00 usec
P4            16.00 usec
PCPD0         70.00 usec
PL2           7.50 dB
PL12          21.30 dB
SFO2          100.6202727 MHz

----- GRADIENT CHANNEL -----
GRAN1         SINE.100
GRAN2         SINE.100
CP11          80.00 %
CP12          20.10 %
P16           1000.00 usec
NS0           320
TD            320
SFO1          100.6203 MHz
FIDRES        52.083332 Hz
SR            145.639 ppm
FUNMODE       Echo-Antiecho
S1            102.4
SF            400.1300314 MHz
WDW           COSYX
SSB           2
LB            0.00 Hz
GB            0
PC            1.40
SI            102.4
MC2           echo-antiecho
SF            100.627490 MHz
WDW           COSYX
SSB           2
LB            0.00 Hz
GB            0
    
```
